# Supplementary material for: DFT study of Ti 3 C 2 MXene nanosheets as a drug delivery system for 5-fluorouracil
Source: Royal Society of Chemistry journal article supplement (doi:10.1039/d4ra02399d), 2024-01-01
Supplement: d4ra02399d1.pdf [file d4ra02399d1.pdf]

Supplementary material for:

## $\text{Ti}_3\text{C}_2$ MXene Nanosheets as Novel Drug Delivery for 5-Fluorouracil Anticancer Drug: An Intuition from DFT

Maryam Sadeghi; Bahram Khoshnevisan\*

*Department of Physics, University of kashan, kashan*

a) Ketoenol ( $\perp_{\text{Ti1}}$ )

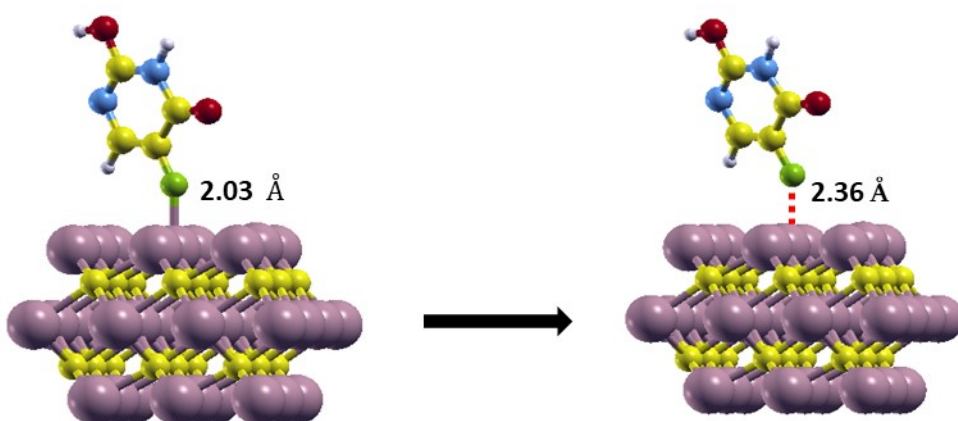

b) Ketoenol ( $\perp_{\text{Ti2}}$ )

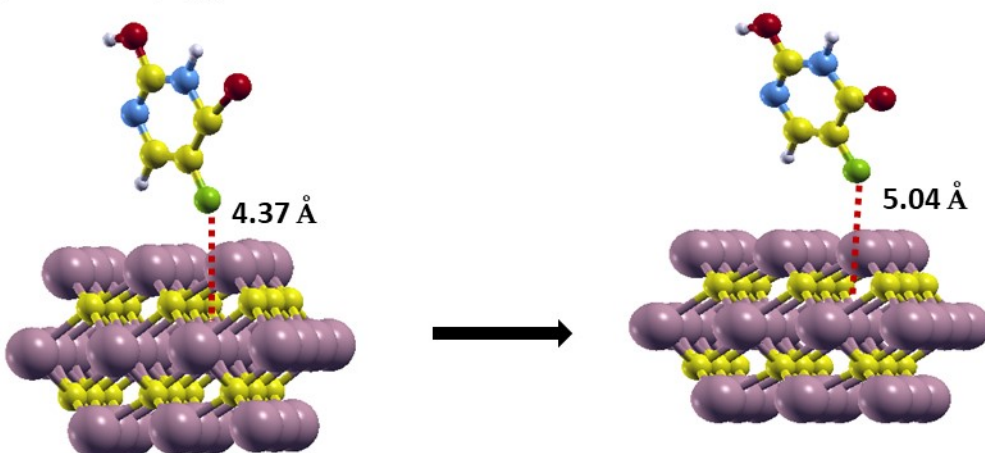

Fig.1.S: $\text{Ti}_3\text{C}_2$ @Ketonel at , a)  $\perp_{\text{Ti1}}$  and b)  $\perp_{\text{Ti2}}$  configuration before (left) and after (right) the adsorption process

a) Dienol ( $\perp_{Ti1}$ )

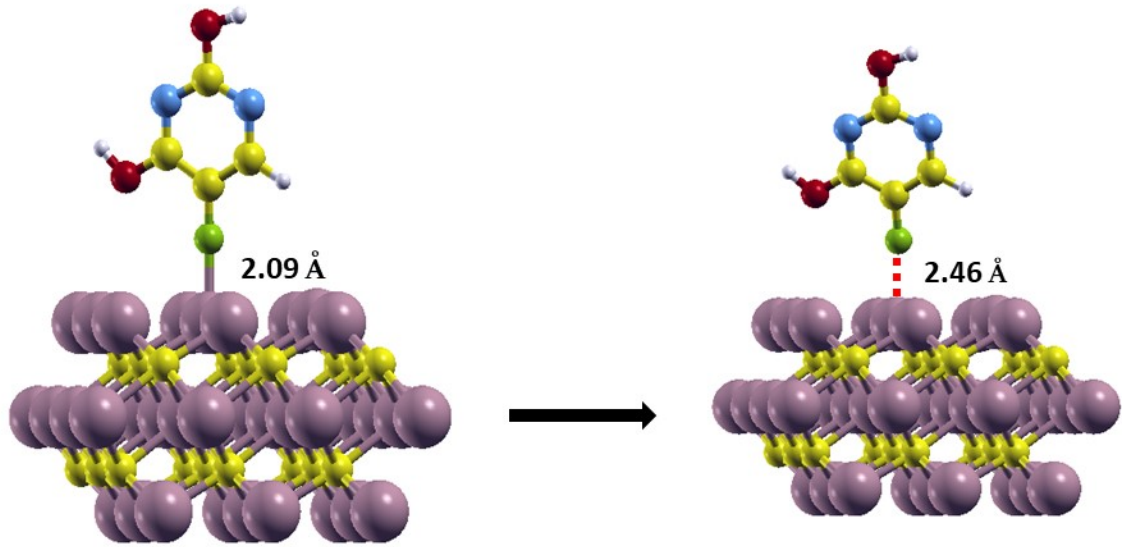

b) Dienol ( $\perp_c$ )

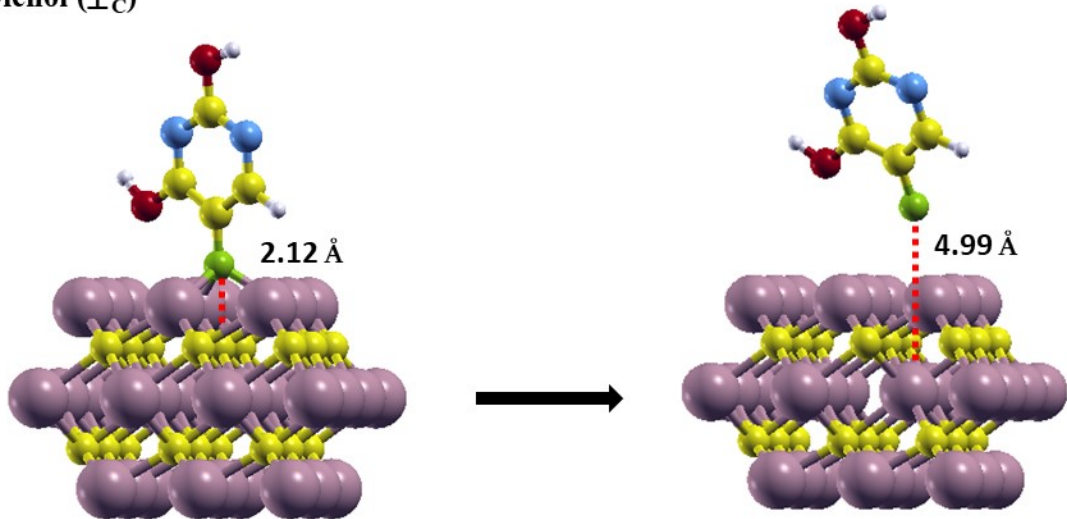

Fig.2.S:Ti<sub>3</sub>C<sub>2</sub>@Dienol at a) $\perp_{Ti1}$  and b) $\perp_c$  configuration before (left) and after (right) the adsorption process

a) Diketo ( $\perp_{Ti1}$ )

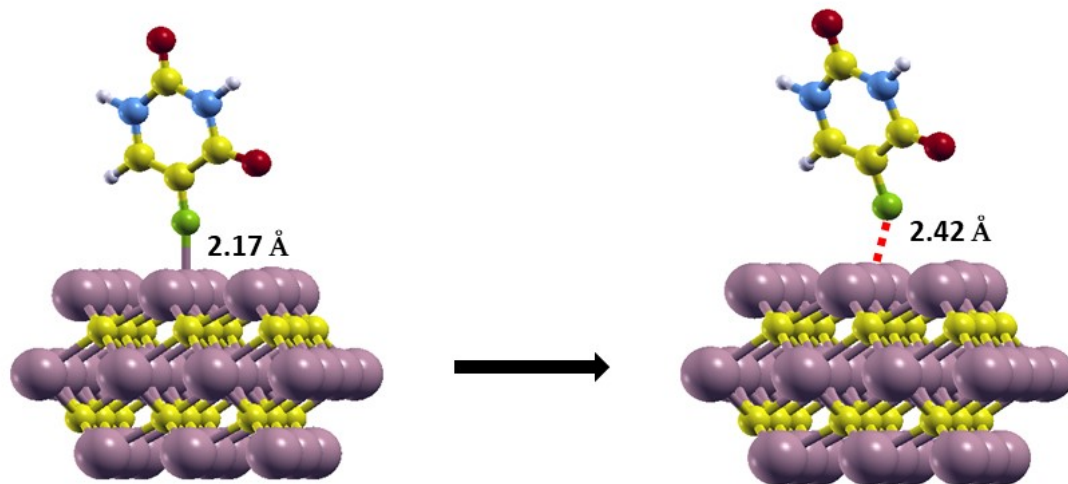

b) Diketo ( $\perp_{Ti2}$ )

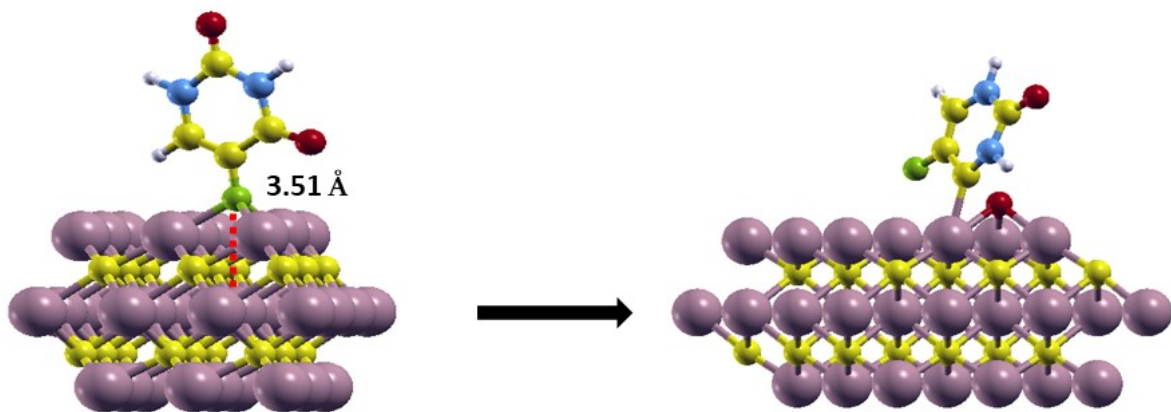

Fig.3.S:Ti<sub>3</sub>C<sub>2</sub>@Diketo at a)  $\perp_{Ti1}$  and b)  $\perp_{Ti2}$  configuration before (left) and after (right) the adsorption process
